# Supplementary material for: Exploring the source of ammonia generation in electrochemical nitrogen reduction using niobium nitride
Source: Royal Society of Chemistry journal article supplement (doi:10.1039/d3ra06475a), 2023-01-01
Supplement: d3ra06475a1.pdf [file d3ra06475a1.pdf]

## **Electronic Supplementary Information**

### **Exploring the Source of Ammonia Generation in Electrochemical Nitrogen Reduction using Niobium Nitride**

So Young Park,<sup>a,c</sup> So Eun Jang,<sup>a</sup> Chang Woo Kim,<sup>b</sup> Youn Jeong Jang,<sup>\*c</sup> Duck Hyun Youn<sup>\*a</sup>

<sup>a</sup>*Department of Chemical Engineering, Department of Integrative Engineering for Hydrogen Safety, Kangwon National University, Chuncheon 24341, South Korea*

<sup>b</sup>*Department of Nanotechnology Engineering, Pukyong National University, Busan 48513, South Korea*

<sup>c</sup>*Department of Chemical Engineering, Hanyang University, Seoul 04763, South Korea*

\*Corresponding Author. Tel: +82-33-250-6338, Fax: +82-33-259-5549

Email address: yjang53@hanyang.ac.kr, youndh@kangwon.ac.kr

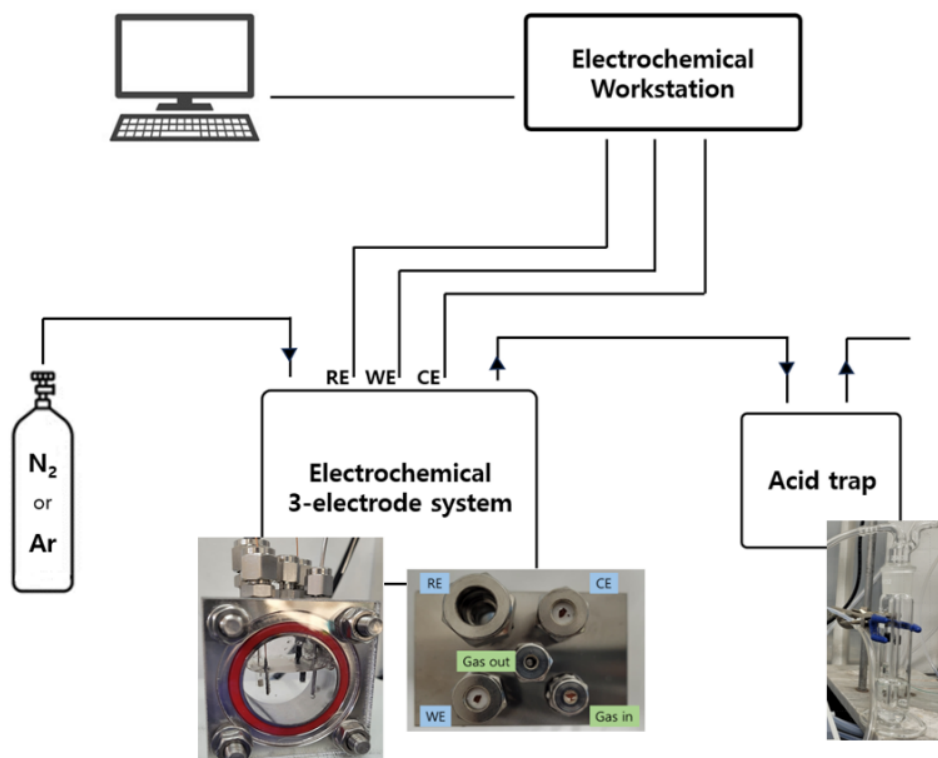

**Fig. S1.** Schematic illustration and photographs of the electrochemical measurement system.

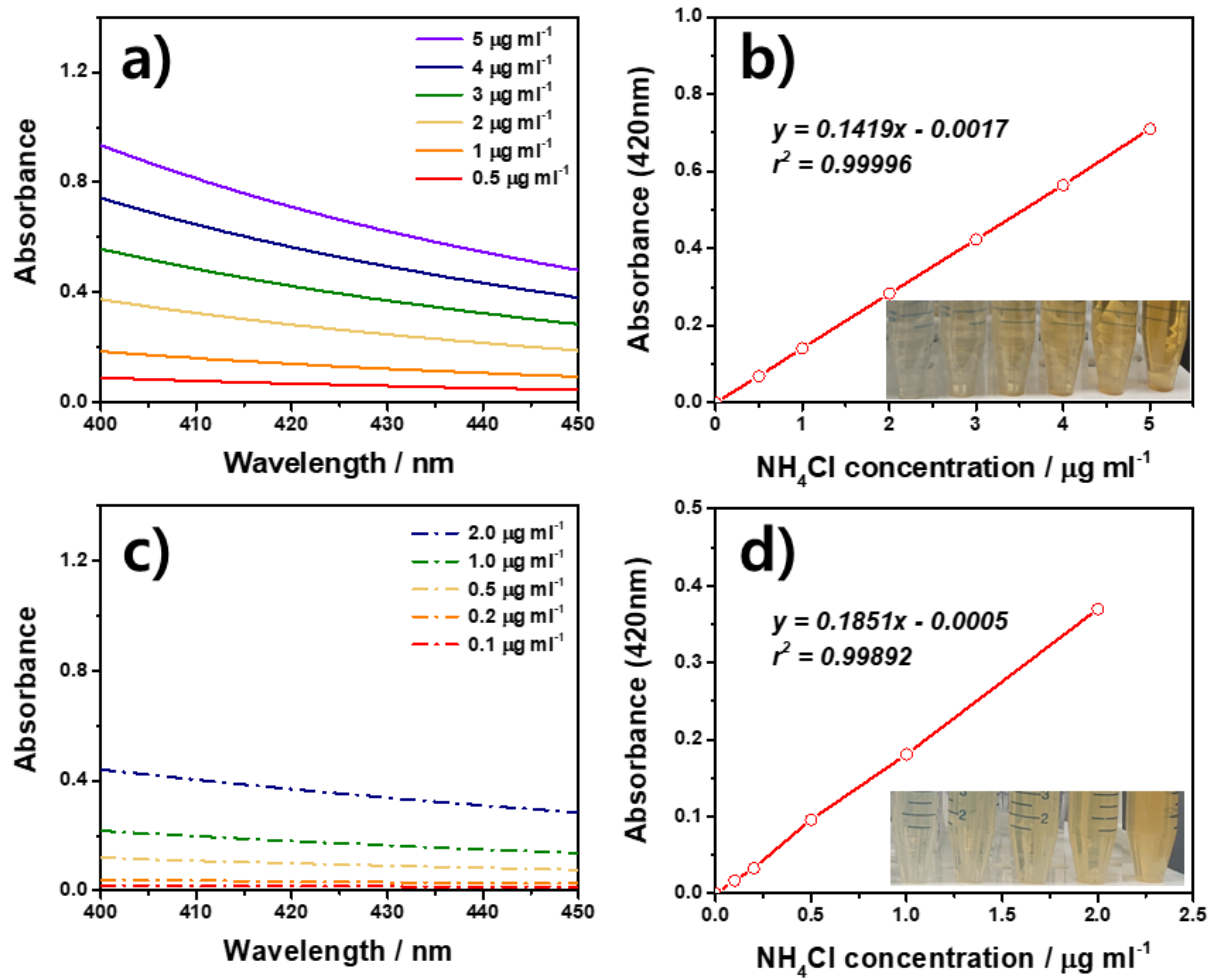

Fig. S2. Ammonia detection method and calibration curves for Nessler's method a) in alkaline electrolyte, b) its calibration curve ( $y = 0.1419x - 0.0017$ ,  $r^2 = 0.99996$ ) and c) in acid trap, d) its calibration curve ( $y = 0.1851x - 0.0005$ ,  $r^2 = 0.99892$ ).

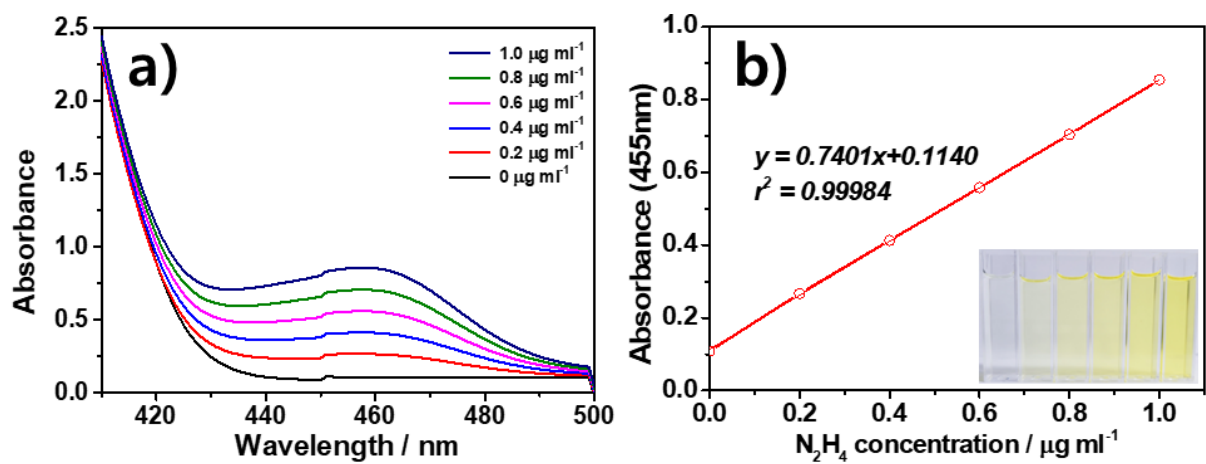

Fig. S3. Hydrazine detection method using a) Watt and Chrisp method and b) calibration curve ( $y = 0.7401x + 0.1140$ ,  $r^2 = 0.99984$ ) of Watt and Chrisp method.

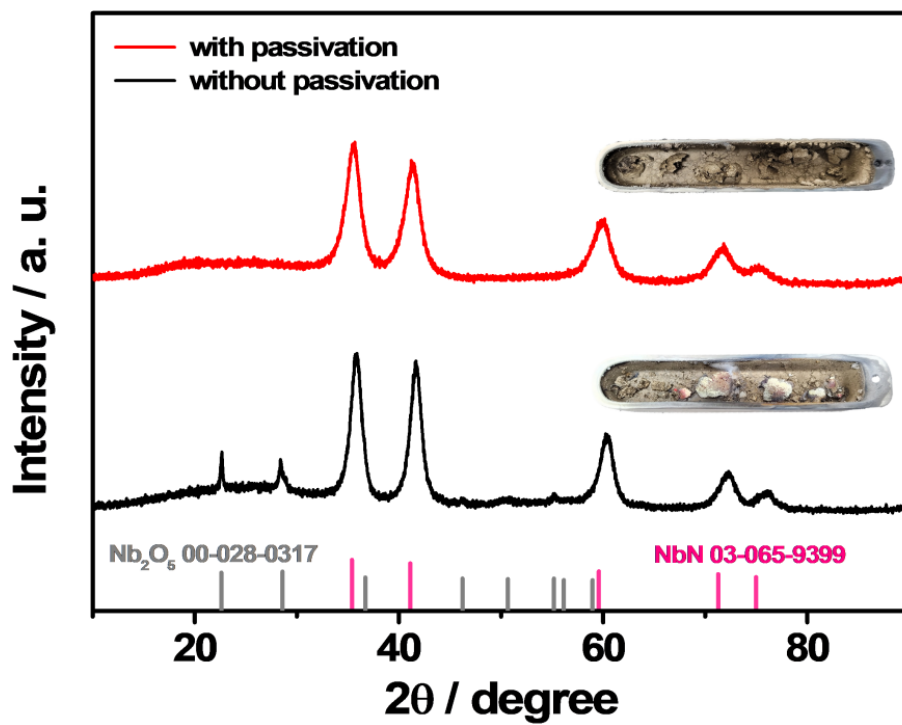

Fig. S4. XRD patterns of prepared catalysts with/without passivation.

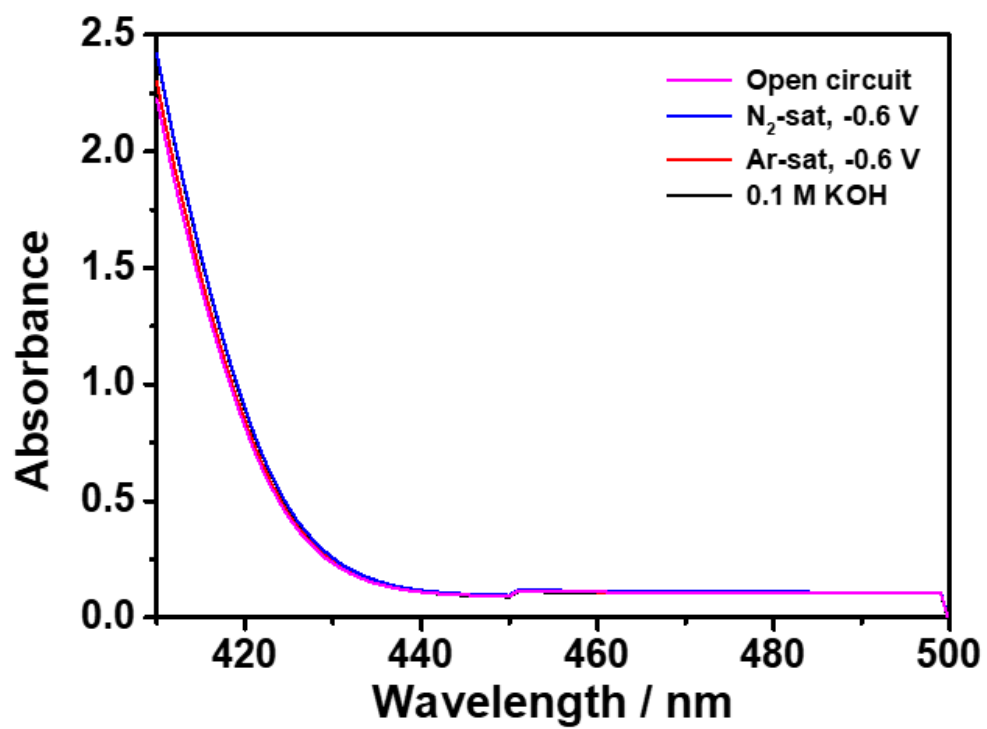

Fig. S5. Hydrazine detection in control experiments.

**Table. S1.** Employed characterization methods for leaching of TMN-based catalysts in NRR.

| Catalyst          | Electrolyte                           | Methods                                    |                            |           | Ref.                                       |
|-------------------|---------------------------------------|--------------------------------------------|----------------------------|-----------|--------------------------------------------|
|                   |                                       | <sup>15</sup> N <sub>2</sub> isotope & NMR | Detection of leached atoms | Acid trap |                                            |
| NbN               | 0.1 M KOH                             | O                                          | ICP-OES (Nb)<br>UV-vis (N) | O         | This work                                  |
| Mo <sub>2</sub> N | 0.1 M HCl                             | O                                          | —                          | —         | ACS Energy Lett. 2019, 4, 1053-1054        |
| VN                | 0.05 M H <sub>2</sub> SO <sub>4</sub> | O                                          | —                          | O         | ACS Sustain. Chem. Eng. 2019, 7, 6839-6850 |
| CrN               | 0.05 M H <sub>2</sub> SO <sub>4</sub> | O                                          | ICP-MS (Cr)<br>CHN-EA (N)  | O         | J. Mater. Chem. A 2021, 9, 8568-8575       |

**Table. S2.** The detected amount of Nb, N and Nb/N molar ratio at various potentials.

| <b>Potentials<br/>(vs RHE)</b> | <b>Nb<br/>(ICP-OES)</b> | <b>NH<sub>3</sub>-N<br/>(UV-vis)</b> | <b>Molar Ratio<br/>(Nb : N)</b> |
|--------------------------------|-------------------------|--------------------------------------|---------------------------------|
| -0.3V                          | 2.79 $\mu\text{mol}$    | 2.90 $\mu\text{mol}$                 | 0.96 : 1                        |
| -0.4V                          | 3.26 $\mu\text{mol}$    | 2.73 $\mu\text{mol}$                 | 1.19 : 1                        |
| -0.5V                          | 3.29 $\mu\text{mol}$    | 2.79 $\mu\text{mol}$                 | 1.18 : 1                        |
| -0.6V                          | 3.84 $\mu\text{mol}$    | 3.82 $\mu\text{mol}$                 | 1.00 : 1                        |
| OCP                            | 3.20 $\mu\text{mol}$    | 2.88 $\mu\text{mol}$                 | 1.11 : 1                        |
